# Supplementary material for: The m6A writers regulated by the IL-6/STAT3 inflammatory pathway facilitate cancer cell stemness in cholangiocarcinoma
Source: PubMed Central journal article supplement (PMC8958887; doi:10.20892/j.issn.2095-3941.2020.0661), 2021-08-04
Supplement: cbm-19-343-s001.pdf [file cbm-19-343-s001.pdf]

## Supplementary materials

**Table S1** Patient demographics and clinicopathological features

| Characteristics                   | Intra-hepatic CCA     | Extra-hepatic CCA     |
|-----------------------------------|-----------------------|-----------------------|
| Number                            | <i>N</i> = 18 (52.0%) | <i>N</i> = 20 (48.0%) |
| Age (years, median and range)     | 61 (45–79)            | 59 (33–86)            |
| Sex (%)                           |                       |                       |
| Male                              | 10 (55.6)             | 11 (55.0)             |
| Female                            | 8 (44.4)              | 9 (45.0)              |
| HBV+ (%)                          | 9 (50.0)              | 2 (10.0)              |
| Tumor size (cm, median and range) | 5.0 (1.2–12.0)        | 2.7 (1.2–5.0)         |
| CA19-9 (U/mL, median and range)   | 213.2 (0.6–17929.9)   | 160.6 (0.69–3925)     |
| Differentiation stage (%)         |                       |                       |
| Well                              | 5 (27.7)              | 6 (30.0)              |
| Moderately                        | 6 (33.3)              | 7 (35.0)              |
| Moderately-poorly                 | 1 (5.6)               | 0 (0.0)               |
| Poorly                            | 3 (16.7)              | 4 (20.0)              |
| N/A <sup>a</sup>                  | 3 (16.7)              | 3 (15.0)              |

<sup>a</sup>Not applicable.

**Table S2** Sequences for primers, siRNAs, and shRNAs used in this study

| Primers          | Sequences (5' → 3')     |
|------------------|-------------------------|
| qPCR primers     |                         |
| qMETTL3-forward  | TTGTCTCCAACCTCCG TAGTG  |
| qMETTL3-reverse  | CCAGATCAGAGAGGTGGTGTAG  |
| qMETTL14-forward | AGAAACTTGCAGGGCTTCCTAT  |
| qMETTL14-reverse | TCTTCTCATATGGCAAATTTTCT |
| qWTAP-forward    | CCTCTCCCAAGAAGGTTTCGATT |
| qWTAP-reverse    | TGCAGACTCCTGCTGTTGTTG   |
| qGAPDH-forward   | GTCTCCTCTGACTTCAACAGCG  |
| qGAPDH-reverse   | ACCACCCTGTTGCTGTAGCCAA  |
| qIGF2BP2-forward | GTTGGTGCCATCATCGAAAGG   |
| qIGF2BP2-reverse | TGGATGGTGACAGGCTTCTCTG  |
| qCTNNB1-forward  | CATCTACACAGTTTGATGCTGCT |
| qCTNNB1-reverse  | GCAGTTTGTGAGTTCAGGGA    |
| qSOX4-forward    | GCACTAGGACGTCTGCCTTT    |
| qSOX4-reverse    | ACACGGCATATTGCACAGGA    |

Table S2 Continued

| Primers                | Sequences (5' → 3')              |
|------------------------|----------------------------------|
| qSOX6-forward          | CAACACCAGGAAGAGACTTACGA          |
| qSOX6-reverse          | TCAAAGCGCGTTCTTTCCTTT            |
| qCD133-forward         | AGTCGGAAACTGGCAGATAGC            |
| qCD133-reverse         | GGTAGTGTGTACTGGGCAAT             |
| qNanog-forward         | AAGGTCCCGGTCAAGAAACAG            |
| qNanog-reverse         | CTTCTGCGTCACACCATTGC             |
| qHPRT1-forward         | CATTATGCTGAGGATTTGGAAAGG         |
| qHPRT1-reverse         | CTTGAGCACACAGAGGGCTAC            |
| ChIP primers for qPCR  |                                  |
| ChIP-METTL3-forward    | GAGAGAGCGGGTATGAGGACTAT          |
| ChIP-METTL3-reverse    | GCTGCTTCTTGTGGCCTGGAT            |
| ChIP-METTL14-forward   | GATGAGATTGCAGCACCTCGATCA         |
| ChIP-METTL14-reverse   | AGCACCATCTTACCACTCTTCCAA         |
| meRIP primers for qPCR |                                  |
| meRIP-CTNNB1-forward   | TCTGAACTTGCATTGTGATTGGC          |
| meRIP-CTNNB1-reverse   | GTCGTTCCGCAACAAGTCC              |
| meRIP-SOX6-forward     | GGCAGCAAATGGACCTTG               |
| meRIP-SOX6-reverse     | GGGAAGAGGAATCCCTGTTGG            |
| meRIP-SOX4-forward     | AGTTTTCTAGAGACTGAAGGAGTCTCC      |
| meRIP-SOX4-reverse     | CCTGCGTGGAGTCTCTCAGT             |
| SiRNA/shRNA            |                                  |
| Si-METTL3-1-S          | 5'CUGCAAGUAUGUUCACUAUGA dTdT 3'  |
| Si-METTL3-1-AS         | 3'dTdT GACGUUCAUACAAGUGAUACU 5'  |
| Si-METTL3-2-S          | 5'AGGAGCCAGCCAAGAAAUCA dTdT 3'   |
| Si-METTL3-2-AS         | 3'dTdT UCCUCGGUCGGUUCUUUAGUU 5'  |
| Si-METTL14-1-S         | 5'AAGGAUGAGUUAUAGCUAAA dTdT 3'   |
| Si-METTL14-1-AS        | 3'dTdT UCCUACUCAAUUAUCGAUUU 5'   |
| Si-METTL14-2-S         | 5'UGGUGCCGUGUAAAUAAGCAA dTdT 3'  |
| Si-METTL14-2-AS        | 3' dTdT ACCACGGCACAAUUUAUCGUU 5' |
| Si-WTAP-1-S            | 5'AAGGUUCGAUUGAGUGAAACA dTdT 3'  |
| Si-WTAP-1-AS           | 3' dTdT UCCAAGCUAACUCACUUUGU 5'  |
| Si-WTAP-2-S            | 5'GGGCAAGUACACAGAUCUUAA dTdT 3'  |
| Si-WTAP-2-AS           | 3' dTdT CCCGUUCAUGUGUCUAGAAUU 5' |
| Si-IGF2BP2-S           | 5'GCAAUUUAUACGAGGUUGU dTdT 3'    |
| Si-IGF2BP2-AS          | 3' dTdT CGUUAAAUAUGCUCCAACA 5'   |

Table S2 Continued

| Primers         | Sequences (5' → 3')                                                         |
|-----------------|-----------------------------------------------------------------------------|
| Sh-METTL3-1-S   | 5'-GATCCCTGCAAGTATGTTCACTATGACTTCCTGTCAGATCATAGTGAACATACTTGCGAG TTTTGG-3'   |
| Sh-METTL3-1-AS  | 5'-AATTCAAAACTGCAAGTATGTTCACTATGATCTGACAGGAAGTCATAGTGAACATACTTGCGAGG-3'     |
| Sh-METTL3-2-S   | 5'-GATCCAGGAGCCAGCCAAGAAATCAACTTCCTGTCAGATTGATTTCTTGGCTGGCTCCTTTTTTG-3'     |
| Sh-METTL3-2-S   | 5'-AATTCAAAAAGGAGCCAGCCAAGAAATCAATCTGACAGGAAGTTGATTTCTTGGCTGGCTCCTG-3'      |
| Sh-METTL14-1-S  | 5'-GATCCAAGGATGAGTTAATAGCTAACTTCCTGTCAGA TTAGCTATTAACATCATCCTT TTTTGG-3'    |
| Sh-METTL14-1-AS | 5'-AATTCAAAAAGGATGAGTTAATAGCTAACTTCCTGACAGGAAGTTAGCTATTAACATCATCCTT G-3'    |
| Sh-METTL14-2-S  | 5'-GATCCTGGTGCCGTGTTAAATAGCAACTTCCTGTCAGATTGCTATTTAACACGGCACCA TTTTGG-3'    |
| Sh-METTL14-2-AS | 5'-AATTCAAAAATGGTGCCGTGTTAAATAGCAATCTGACAGGAAGTTGCTATTTAACACGGCACCAG-3'     |
| Sh-WTAP-1-S     | 5'-GATCCAAGGTTGCGATTGAGTGAAACACTTCCTGTCAGATGTTTCACTCAATCGAACCTT TTTTGG-3'   |
| Sh-WTAP-1-AS    | 5'-AATTCAAAAAGGTTGCGATTGAGTGAAACATCTGACAGGAAGTTTCACTCAATCGAACCTT G-3'       |
| Sh-WTAP-2-S     | 5'-GATCCGGGCAAGTACACAGATCTTAATTCCTGTCAGATTAAGATCTGTGTAAGTACTGCCC TTTTGG-3'  |
| Sh-WTAP-2-AS    | 5'-AATTCAAAAAGGGCAAGTACACAGATCTTAATCTGACAGGAAGTTAAGATCTGTGTAAGTACTGCCC G-3' |
| Sh-IGF2BP2-S    | 5'-GATCCGCAATTTATACGAGGTTGTCTTCTGTCAGAACCAACCTCGTATAAATTGC TTTTGG-3'        |
| Sh-IGF2BP2-AS   | 5'-AATTCAAAAAGCAATTTATACGAGGTTGTCTGTCAGGAAGACAACCTCGTATAAATTGC G-3'         |

Table S3 All of the antibodies and reagents used in this study

| Name                     | Species | Company         | NO.        |
|--------------------------|---------|-----------------|------------|
| CD133                    | Rabbit  | Proteintech     | 18470-1-AP |
| P-STAT3                  | Rabbit  | CST             | 9145S      |
| T-STAT3                  | Rabbit  | Santa Cruz      | sc-8019    |
| METTL3                   | Rabbit  | Proteintech     | 15073-1-AP |
| METTL14                  | Rabbit  | Proteintech     | 26158-1-AP |
| WTAP                     | Mouse   | Proteintech     | 60188-1-Ig |
| CTNNB1                   | Rabbit  | CST             | 8480S      |
| GAPDH polyAb             | Rabbit  | Proteintech     | 10494-1-AP |
| β-actin                  | Mouse   | Sigma-Aldrich   | A2228      |
| Goat Anti-Mouse IgG HRP  | Mouse   | Thermo Fisher   | H10007     |
| Goat Anti-Rabbit IgG HRP | Rabbit  | Thermo Fisher   | A18903     |
| m6A                      | Rabbit  | Synaptic System | 202003     |
| IGF2BP2                  | Mouse   | Santa Cruz      | sc-377014  |

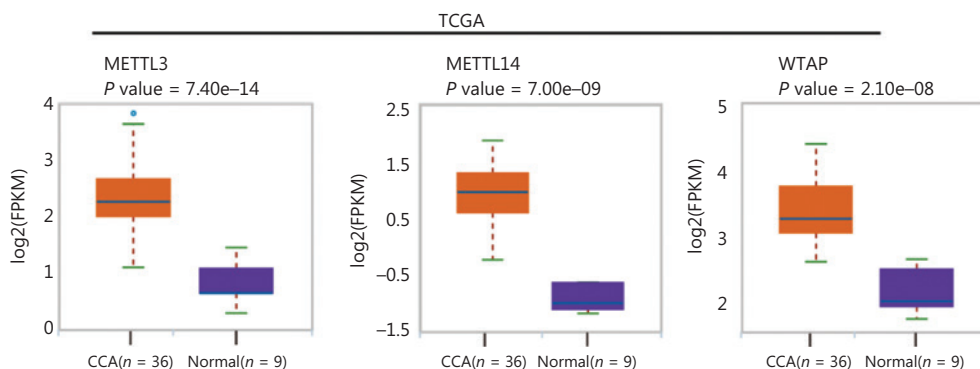

**Figure S1** Expression of m6A genes in The Tumor Cancer Genome Atlas (TCGA) database. The expressions of METTL3, METTL14, and WTAP in TCGA database of cholangiocarcinomas.

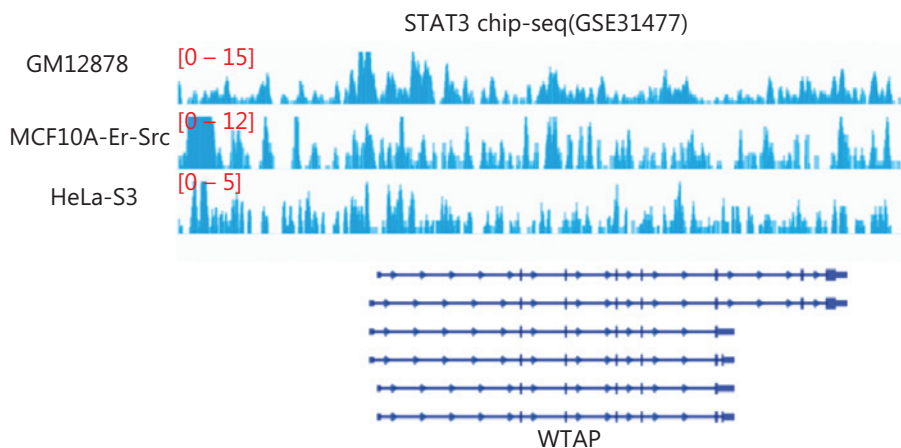

**Figure S2** STAT3 was located at the genetic locus of WTAP in the GES31477 data set.

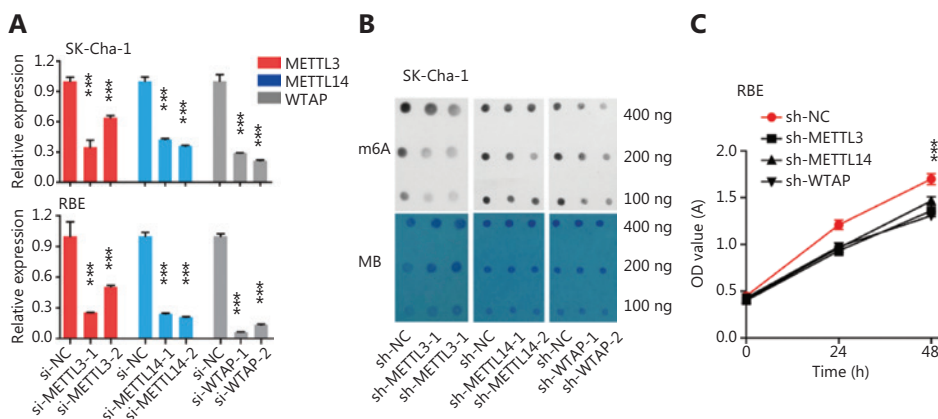

**Figure S3** Knocking down m6A writers inhibited cholangiocarcinoma (CCA) cell proliferation. (A) The qRT-PCR showing the knockdown efficiency of METTL3, METTL14, and WTAP in CCA cells. Error bars denote  $\pm$  SEM (\*\*\*)  $P < 0.001$  in 3 independent experiments. (B) Dot blots showing the global m6A levels after knocking-down m6A genes. (C) Cell proliferation was measured using a CCK-8 assay at 0, 24, and 48 h in METTL3-, METTL14-, and WTAP-silenced CCA cells. Error bars denote  $\pm$  SEM (\*\*\*)  $P < 0.001$  in 3 independent experiments.



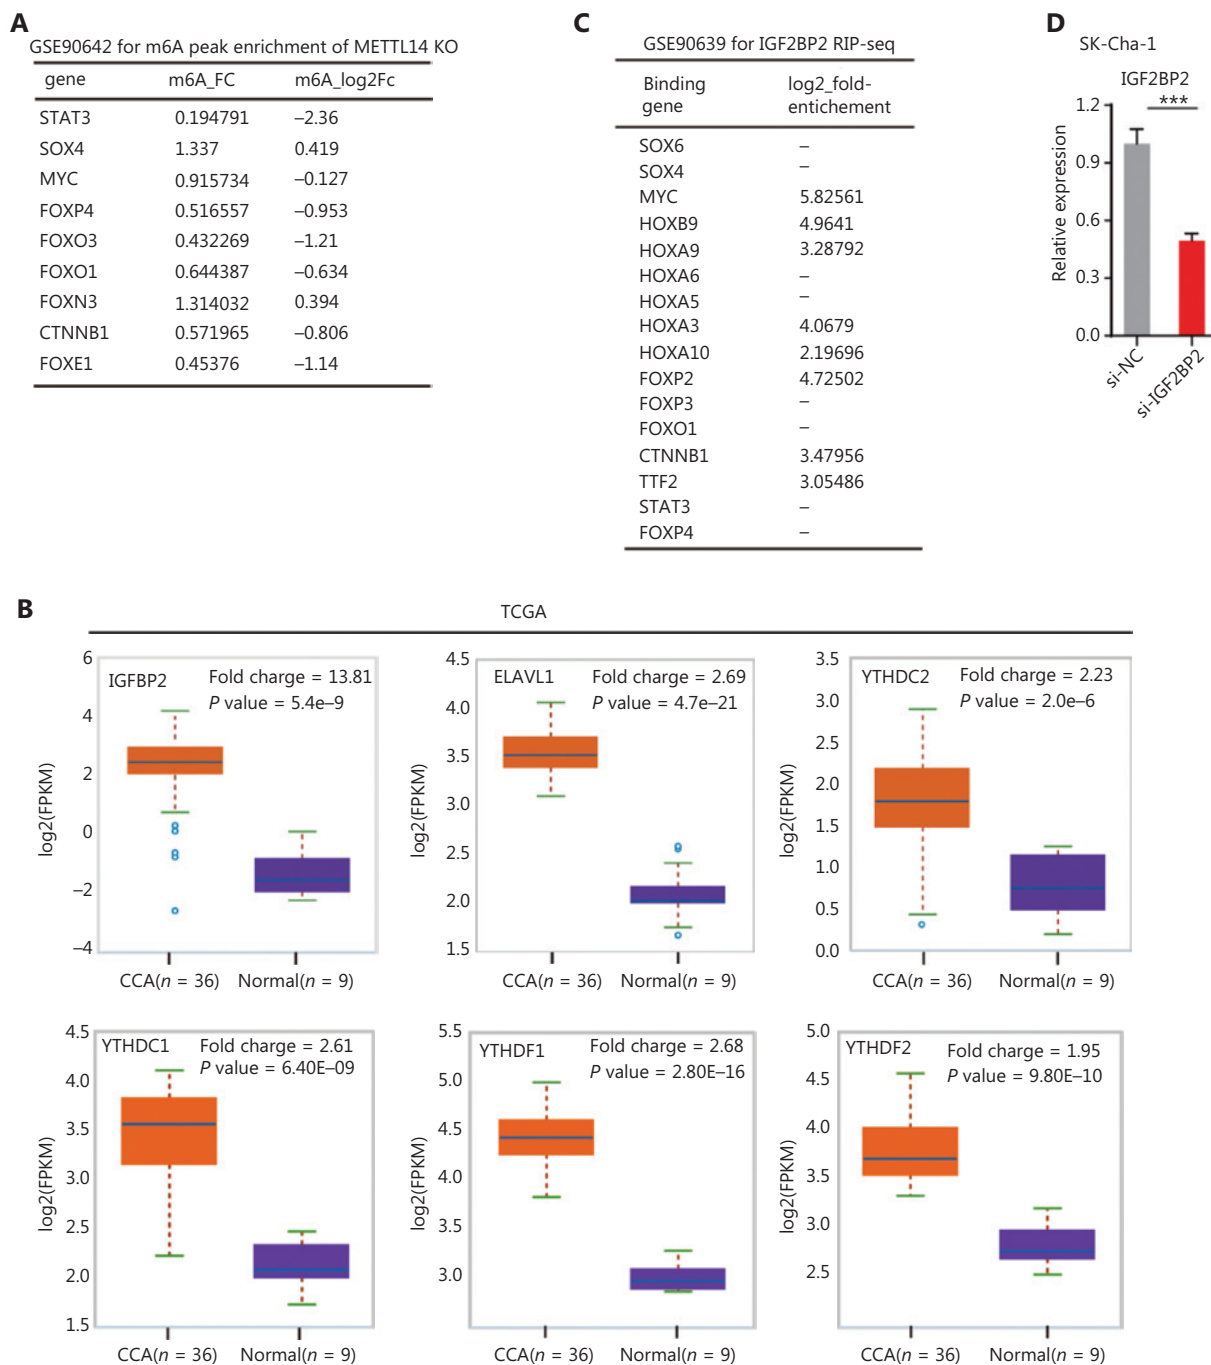

**Figure S5** IGF2BP2 improved the RNA stability and translation of stemness-related genes. (A) The GSE90642 data set showing the enrichment of m6A modifications of some stemness-related genes between METTL14 silenced and control cells. (B) The expression patterns of IGF2BP2, ELAVL1, YTHDC2, YTHDC1, YTHDF1, and YTHDF2 in The Cancer Genome Atlas datasets consist of 36 CCA and 9 healthy samples. (C) The GSE90639 data set showing the IGF2BP2-enrichment of many stemness-related genes. (D) The qRT-PCR showing the expression levels of IGF2BP2 in the IGF2BP2 knockdown cells. Error bars denote  $\pm$  SEM (\*\* $P < 0.01$ ; \*\*\* $P < 0.001$ ) in 3 independent experiments.

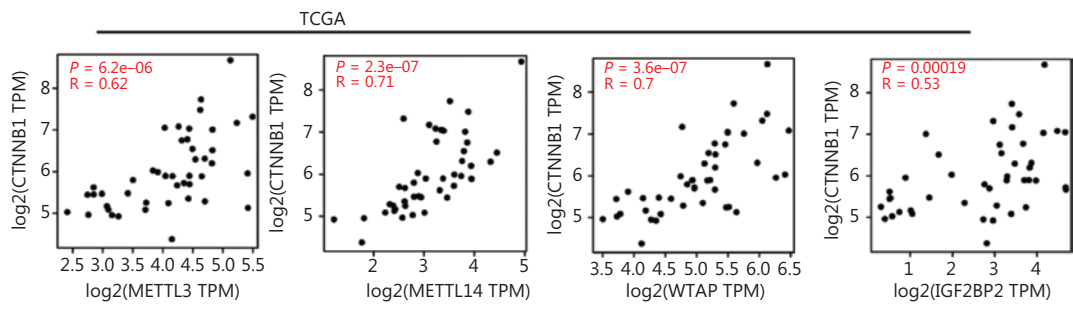

**Figure S6** The expression correlations of m6A genes and CTNNB1. Scatter plot showing the correlation of expression between m6A genes and CTNNB1 in the TCGA database of CCA.
